# Supplementary material for: A novel monoclonal antibody targeting carboxymethyllysine, an advanced glycation end product in atherosclerosis and pancreatic cancer
Source: PubMed Central journal article supplement (PMC5805250; doi:10.1371/journal.pone.0191872), 2018-02-08
Supplement: pone.0191872.s006.pdf [file pone.0191872.s006.pdf]

**S1 Table: CML-BSA peptide library PepLib1**

| Peptide nr | 20mer aa stretch | Amino acid sequence      |
|------------|------------------|--------------------------|
| 1          | 1-20             | MK*WVTFISLLLLFSSAYSRG    |
| 2          | 11-30            | LLFSSAYSRGVFRRDTHK*SE    |
| 3          | 21-40            | VFRRDTHK*SEIAHRFK*DLGE   |
| 4          | 31-50            | IAHRFK*DLGEEHFK*GLVLIA   |
| 5          | 41-60            | EHFk*GLVLIAFSQYLQQCPF    |
| 6          | 51-70            | FSQYLQQCPFDEHVk*LVNEL    |
| 7          | 61-80            | DEHVk*LVNELTEFAK*TCVAD   |
| 8          | 71-90            | TEFAK*TCVADESHAGCEK*SL   |
| 9          | 81-100           | ESHAGCEK*SLHTLFGDELCK*   |
| 10         | 91-110           | HTLFGDELCK*VASLRETYGD    |
| 11         | 101-120          | VASLRETYGDMADCCEK*QEP    |
| 12         | 111-130          | MADCCEK*QEPERNECFLSHK*   |
| 13         | 121-140          | ERNECFLSHK*DDSPDLPK*LK*  |
| 14         | 131-150          | DDSPDLPK*LK*PDPNTLCDEF   |
| 15         | 141-160          | PDPNTLCDEFK*ADEK*K*FWGK* |
| 16         | 151-170          | K*ADEK*K*FWGK*LYEIAARRHP |
| 17         | 161-180          | LYEIAARRHPYFYAPELLYY     |
| 18         | 171-190          | YFYAPELLYYANK*YNGVFQE    |
| 19         | 181-200          | ANK*YNGVFQECCQAEDK*GAC   |
| 20         | 191-210          | CCQAEDK*GACLLPK*IETMRE   |
| 21         | 201-220          | LLPK*IETMREK*VLASSARQR   |
| 22         | 211-230          | K*VLASSARQLRCASIQK*FG    |
| 23         | 221-240          | LRCASIQK*FGERALK*AWSVA   |
| 24         | 231-250          | ERALK*AWSVARLSQK*FPK*AE  |
| 25         | 241-260          | RLSQK*FPK*AEFVEVTK*LVTD  |
| 26         | 251-270          | FVEVTK*LVTDLTK*VHK*ECCH  |
| 27         | 261-280          | LTK*VHK*ECCHGDLLECADDR   |
| 28         | 271-290          | GDLLCADDRADLAK*YICDN     |
| 29         | 281-300          | ADLAK*YICDNQDTISSK*LK*E  |
| 30         | 291-310          | QDTISSK*LK*ECCDK*PLLEK*S |
| 31         | 301-320          | CCDK*PLLEK*SHCIAEVEK*DA  |
| 32         | 311-330          | HCIAEVEK*DAIPENLPPLTA    |
| 33         | 321-340          | IPENLPPLTADFAEDK*DVCK*   |
| 34         | 331-350          | DFAEDK*DVCK*NYQEAK*DAFL  |
| 35         | 341-360          | NYQEAK*DAFLGSFLYEYSRR    |
| 36         | 351-370          | GSFLYEYSRRHPEYAVSVLL     |
| 37         | 361-380          | HPEYAVSVLLRLAK*EYEATL    |
| 38         | 371-390          | RLAK*EYEATLEECCA*DDPH    |
| 39         | 381-400          | EECCA*DDPHACYSTVFDK*L    |
| 40         | 391-410          | ACYSTVFDK*LK*HLVDEPQNL   |
| 41         | 401-420          | K*HLVDEPQNLIK*QNCDQFEK*  |
| 42         | 411-430          | IK*QNCDQFEK*LGEYGFQNAL   |
| 43         | 421-440          | LGEYGFQNALIVRYTRK*VPQ    |
| 44         | 431-450          | IVRYTRK*VPQVSTPTLVEVS    |
| 45         | 441-460          | VSTPTLVEVSRSLGK*VGTRC    |
| 46         | 451-470          | RSLGK*VGTRCCTK*PESERMP   |
| 47         | 461-480          | CTK*PESERMPCTEDYLSLIL    |
| 48         | 471-490          | CTEDYLSLILNRLCVLHEK*T    |

|    |         |                                                 |
|----|---------|-------------------------------------------------|
| 49 | 481-500 | NRLCVLHEK*TPVSEK*VTK*CC                         |
| 50 | 491-510 | PVSEK*VTK*CCTESLVNRRPC                          |
| 51 | 501-520 | TESLVNRRPCFSALTPDETY                            |
| 52 | 511-530 | FSALTPDETYVPK*AFDEK*LF                          |
| 53 | 521-540 | VPK*AFDEK*LFTFHADICTLP                          |
| 54 | 531-550 | TFHADICTLPDTEK*QIK*K*QT                         |
| 55 | 541-560 | DTEK*QIK*K*QTALVELLK*HK*P                       |
| 56 | 551-570 | ALVELLK*HK*PK*ATEEQLK*TV                        |
| 57 | 561-580 | K*ATEEQLK*TVMENFVAFVDK*                         |
| 58 | 571-590 | MENFVAFVDK*CCAADDK*EAC                          |
| 59 | 581-600 | CCAADDK*EACFAVEGPK*LVV                          |
| 60 | 591-607 | FAVEGPK*LVVSTQTALA                              |
| 61 |         | unmodified BSA (negative control)               |
| 62 |         | CML-BSA, reductive amination (positive control) |
| 63 |         | CML-IgG, reductive amination (positive control) |
| 64 |         | Peptide 1-6 (positive controls)                 |
