# Supplementary material for: A novel monoclonal antibody targeting carboxymethyllysine, an advanced glycation end product in atherosclerosis and pancreatic cancer
Source: PubMed Central journal article supplement (PMC5805250; doi:10.1371/journal.pone.0191872), 2018-02-08
Supplement: pone.0191872.s007.pdf [file pone.0191872.s007.pdf]

**S2 Table: BSA peptide library PepLib2**

| <b>Peptide nr</b> | <b>20mer aa stretch</b> | <b>Amino acid sequence</b> |
|-------------------|-------------------------|----------------------------|
| 1                 | 1-20                    | MKWVTFISLLLLFSSAYSRG       |
| 2                 | 11-30                   | LLFSSAYSRGVFRRDTHKSE       |
| 3                 | 21-40                   | VFRRDTHKSEIAHRFKDLGE       |
| 4                 | 31-50                   | IAHRFKDLGEEHFKGLVLI        |
| 5                 | 41-60                   | EHFKGLVLIAFSQYLQQCPF       |
| 6                 | 51-70                   | FSQYLQQCPFDEHVKLVNEL       |
| 7                 | 61-80                   | DEHVKLVNELTEFAKTCVAD       |
| 8                 | 71-90                   | TEFAKTCVADESHAGCEKSL       |
| 9                 | 81-100                  | ESHAGCEKSLHTLFGDELCK       |
| 10                | 91-110                  | HTLFGDELCKVASLRETYGD       |
| 11                | 101-120                 | VASLRETYGDMADCCEKQEP       |
| 12                | 111-130                 | MADCCEKQEPERNECFLSHK       |
| 13                | 121-140                 | ERNECFLSHKDDSPDLPKPK       |
| 14                | 131-150                 | DDSPDLPKPKPDPNTLCDEF       |
| 15                | 141-160                 | PDPNTLCDEFKADEKKFWGK       |
| 16                | 151-170                 | KADEKKFWGKYLEIARRHP        |
| 17                | 161-180                 | YLEIARRHPYFYAPPELLYY       |
| 18                | 171-190                 | YFYAPPELLYYANKYNGVFQE      |
| 19                | 181-200                 | ANKYNGVFQECCQAEDKGAC       |
| 20                | 191-210                 | CCQAEDKGACLLPKIETMRE       |
| 21                | 201-220                 | LLPKIETMREKVLASSARQR       |
| 22                | 211-230                 | KVLASSARQLRCASIQKFG        |
| 23                | 221-240                 | LRCASIQKFGERALKAWSVA       |
| 24                | 231-250                 | ERALKAWSVARLSQKFPKAE       |
| 25                | 241-260                 | RLSQKFPKAEFVEVTKLVTD       |
| 26                | 251-270                 | FVEVTKLVTDLTKVHKECCH       |
| 27                | 261-280                 | LTKVHKECCHGDLLCADDR        |
| 28                | 271-290                 | GDLLCADDRADLAKYICDN        |
| 29                | 281-300                 | ADLAKYICDNQDTISSKLKE       |
| 30                | 291-310                 | QDTISSKLKECCDKPILLEKS      |
| 31                | 301-320                 | CCDKPILLEKSHCIAEVEKDA      |
| 32                | 311-330                 | HCIAEVEKDAIPENLPPLTA       |
| 33                | 321-340                 | IPENLPPLTADFAEDKDVCK       |
| 34                | 331-350                 | DFAEDKDVCKNYQEAKDAFL       |
| 35                | 341-360                 | NYQEAKDAFLGSFLYEYSRR       |
| 36                | 351-370                 | GSFLYEYSRRHPEYAVSVLL       |
| 37                | 361-380                 | HPEYAVSVLLRLAKEYEATL       |
| 38                | 371-390                 | RLAKEYEATLEECCAADDPH       |
| 39                | 381-400                 | EECCAADDPHACYSTVFDKL       |
| 40                | 391-410                 | ACYSTVFDKHLVDEPQNL         |
| 41                | 401-420                 | KHLVDEPQNLKQNCQDFEK        |
| 42                | 411-430                 | IKQNCQDFEKLGEYGFQNAL       |
| 43                | 421-440                 | LGEYGFQNALIVRYTRKVPQ       |
| 44                | 431-450                 | IVRYTRKVPQVSTPTLVEVS       |
| 45                | 441-460                 | VSTPTLVEVSRSLGKVGTRC       |
| 46                | 451-470                 | RSLGKVGTRCCTKPESERMP       |
| 47                | 461-480                 | CTKPESERMPCTEDYLSLIL       |
| 48                | 471-490                 | CTEDYLSLILNRLCVLHEKT       |

|    |         |                                                 |
|----|---------|-------------------------------------------------|
| 49 | 481-500 | NRLCVLHEKTPVSEKVTKCC                            |
| 50 | 491-510 | PVSEKVTCCCTESLVNRRPC                            |
| 51 | 501-520 | TESLVNRRPCFSALTPDETY                            |
| 52 | 511-530 | FSALTPDETYVPKAFDEKLF                            |
| 53 | 521-540 | VPKAFDEKLFFHADICTLP                             |
| 54 | 531-550 | TFHADICTLPDTEKQIKKQT                            |
| 55 | 541-560 | DTEKQIKKQTALVELLKHKP                            |
| 56 | 551-570 | ALVELLKHKPKATEEQLKTV                            |
| 57 | 561-580 | KATEEQLKTMENFVAFVDK                             |
| 58 | 571-590 | MENFVAFVDKCCAADDKEAC                            |
| 59 | 581-600 | CCAADDKEACFAVEGPKLVV                            |
| 60 | 591-607 | FAVEGPKLVVSTQTALA                               |
| 61 |         | unmodified BSA (negative control)               |
| 62 |         | CML-BSA, reductive amination (positive control) |
| 63 |         | CML-IgG, reductive amination (positive control) |
| 64 |         | Peptide 1-6 (positive controls)                 |
