# Supplementary material for: A novel monoclonal antibody targeting carboxymethyllysine, an advanced glycation end product in atherosclerosis and pancreatic cancer
Source: PubMed Central journal article supplement (PMC5805250; doi:10.1371/journal.pone.0191872), 2018-02-08
Supplement: pone.0191872.s008.pdf [file pone.0191872.s008.pdf]

**S3 Table: Epitope mapping library PepLib3**

| <b>Peptide nr</b> | <b>Amino acid sequence</b>                   |
|-------------------|----------------------------------------------|
| 1                 | DDSPDLP(CML)L(CML)PDPNTLCDEF                 |
| 2                 | <u>A</u> DDSPDLP(CML)L(CML)PDPNTLCDEF        |
| 3                 | D <u>A</u> SPDLP(CML)L(CML)PDPNTLCDEF        |
| 4                 | DD <u>A</u> PDLP(CML)L(CML)PDPNTLCDEF        |
| 5                 | DDSP <u>A</u> DLP(CML)L(CML)PDPNTLCDEF       |
| 6                 | DDSP <u>A</u> LP(CML)L(CML)PDPNTLCDEF        |
| 7                 | DDSPD <u>A</u> P(CML)L(CML)PDPNTLCDEF        |
| 8                 | DDSPD <u>L</u> A(CML)L(CML)PDPNTLCDEF        |
| 9                 | DDSPDLP <u>A</u> L(CML)PDPNTLCDEF            |
| 10                | DDSPDLP(CML) <u>A</u> (CML)PDPNTLCDEF        |
| 11                | DDSPDLP(CML)L <u>A</u> PDPNTLCDEF            |
| 12                | DDSPDLP(CML)L(CML) <u>A</u> DNTLCDEF         |
| 13                | DDSPDLP(CML)L(CML) <u>P</u> APNTLCDEF        |
| 14                | LP(CML)L(CML)PDP                             |
| 15                | <u>P</u> DLP(CML)L(CML)P <u>D</u> PN         |
| 16                | <u>D</u> PLP(CML)L(CML)P <u>D</u> PN         |
| 17                | PL <u>D</u> P(CML)L(CML)P <u>D</u> PN        |
| 18                | PLP <u>D</u> (CML)L(CML)P <u>D</u> PN        |
| 19                | <u>P</u> DLP(CML)L(CML) <u>D</u> PPN         |
| 20                | <u>P</u> DLP(CML)L(CML)PP <u>D</u> N         |
| 21                | <u>P</u> DLP(CML)L(CML)PP <u>N</u> <u>D</u>  |
| 22                | PLP <u>D</u> (CML)L(CML) <u>D</u> PPN        |
| 23                | PL <u>D</u> P(CML)L(CML)P <u>D</u> PN        |
| 24                | <u>P</u> DLP(CML)L(CML)PP <u>D</u> N         |
| 25                | <u>D</u> PLP(CML)L(CML)PP <u>N</u> <u>D</u>  |
| 26                | <u>P</u> <u>E</u> LP(CML)L(CML)P <u>D</u> PN |
| 27                | <u>P</u> <u>D</u> LP(CML)L(CML)P <u>E</u> PN |
| 28                | <u>P</u> <u>E</u> LP(CML)L(CML)P <u>E</u> PN |
| 29                | PDLP(CML) <u>A</u> (CML)PDPN                 |
| 30                | PDLP(CML) <u>C</u> (CML)PDPN                 |
| 31                | PDLP(CML) <u>D</u> (CML)PDPN                 |
| 32                | PDLP(CML) <u>E</u> (CML)PDPN                 |
| 33                | PDLP(CML) <u>F</u> (CML)PDPN                 |
| 34                | PDLP(CML) <u>G</u> (CML)PDPN                 |
| 35                | PDLP(CML) <u>H</u> (CML)PDPN                 |
| 36                | PDLP(CML) <u>I</u> (CML)PDPN                 |
| 37                | PDLP(CML) <u>K</u> (CML)PDPN                 |
| 38                | PDLP(CML) <u>L</u> (CML)PDPN                 |
| 39                | PDLP(CML) <u>M</u> (CML)PDPN                 |
| 40                | PDLP(CML) <u>N</u> (CML)PDPN                 |
| 41                | PDLP(CML) <u>P</u> (CML)PDPN                 |
| 42                | PDLP(CML) <u>Q</u> (CML)PDPN                 |
| 43                | PDLP(CML) <u>R</u> (CML)PDPN                 |
| 44                | PDLP(CML) <u>S</u> (CML)PDPN                 |
| 45                | PDLP(CML) <u>T</u> (CML)PDPN                 |
| 46                | PDLP(CML) <u>V</u> (CML)PDPN                 |
| 47                | PDLP(CML) <u>W</u> (CML)PDPN                 |
| 48                | PDLP(CML) <u>Y</u> (CML)PDPN                 |

|    |                                                 |
|----|-------------------------------------------------|
| 49 | DDSPDLP(CML)L(CML)PD <u>A</u> N TLCDEF          |
| 50 | DDSPDLP(CML)L(CML)PDP <u>A</u> TLCDEF           |
| 51 | DDSPDLP(CML)L(CML)PDPN <u>A</u> L CDEF          |
| 52 | DDSPDLP(CML)L(CML)PDPNT <u>A</u> CDEF           |
| 53 | DDSPDLP(CML)L(CML)PDPNTL <u>A</u> DEF           |
| 54 | DDSPDLP(CML)L(CML)PDPNTLC <u>A</u> EF           |
| 55 | DDSPDLP(CML)L(CML)PDPNTLCDA <u>F</u>            |
| 56 | DSPDLP(CML)L(CML)PDPNTLCDE                      |
| 57 | SPDLP(CML)L(CML)PDPNTLCD                        |
| 58 | PDLP(CML)L(CML)PDPNTLC                          |
| 59 | DLP(CML)L(CML)PDPNTL                            |
| 60 | P(CML)L(CML)PDPN                                |
| 61 | P(CML)L(CML)PDP                                 |
| 62 | P(CML)L(CML)PD                                  |
| 63 | P(CML)L(CML)P                                   |
| 64 | (CML)L(CML)                                     |
| 65 | DDSPDLP( <u>SL</u> )L( <u>SL</u> )PDPNTLCDEF    |
| 66 | CML-BSA reductive amination (positive control)  |
| 67 | BSA (negative control)                          |
| 68 | CML-IgG, reductive amination (positive control) |
| 69 | IgG (negative control)                          |
