# Supplementary material for: A novel monoclonal antibody targeting carboxymethyllysine, an advanced glycation end product in atherosclerosis and pancreatic cancer
Source: PubMed Central journal article supplement (PMC5805250; doi:10.1371/journal.pone.0191872), 2018-02-08
Supplement: pone.0191872.s009.pdf [file pone.0191872.s009.pdf]

**S4 Table: Glycated protein library ProtLib1**

| <b>Target nr</b> | <b>Protein</b> | <b>Protein concentration (mg/mL)</b> | <b>Carbohydrate</b> | <b>Carbohydrate concentration (mM)</b> | <b>pH</b> | <b>T (°C)</b> | <b>Incubation time</b> |
|------------------|----------------|--------------------------------------|---------------------|----------------------------------------|-----------|---------------|------------------------|
| 1                | BSA            | 50                                   | glucose             | 500                                    | 7.2       | 37            | 1 day                  |
| 2                | BSA            | 50                                   | glucose             | 500                                    | 7.2       | 37            | 2 days                 |
| 3                | BSA            | 50                                   | glucose             | 500                                    | 7.2       | 37            | 3 days                 |
| 4                | BSA            | 50                                   | glucose             | 500                                    | 7.2       | 37            | 1 week                 |
| 5                | BSA            | 50                                   | glucose             | 500                                    | 7.2       | 37            | 2 weeks                |
| 6                | BSA            | 50                                   | glucose             | 500                                    | 7.2       | 37            | 3 weeks                |
| 7                | BSA            | 50                                   | glucose             | 500                                    | 7.2       | 37            | 4 weeks                |
| 8                | BSA            | 50                                   | glucose             | 500                                    | 10        | 37            | 1 day                  |
| 9                | BSA            | 50                                   | glucose             | 500                                    | 10        | 37            | 2 days                 |
| 10               | BSA            | 50                                   | glucose             | 500                                    | 10        | 37            | 3 days                 |
| 11               | BSA            | 50                                   | glucose             | 500                                    | 10        | 37            | 1 week                 |
| 12               | BSA            | 50                                   | glucose             | 500                                    | 10        | 37            | 2 weeks                |
| 13               | BSA            | 50                                   | glucose             | 500                                    | 10        | 37            | 3 weeks                |
| 14               | BSA            | 50                                   | glucose             | 500                                    | 10        | 37            | 4 weeks                |
| 15               | BSA            | 50                                   | glucose             | 500                                    | 7.2       | 50            | 1 day                  |
| 16               | BSA            | 50                                   | glucose             | 500                                    | 7.2       | 50            | 2 days                 |
| 17               | BSA            | 50                                   | glucose             | 500                                    | 7.2       | 50            | 3 days                 |
| 18               | BSA            | 50                                   | glucose             | 500                                    | 7.2       | 50            | 1 week                 |
| 19               | BSA            | 50                                   | glucose             | 500                                    | 7.2       | 50            | 2 weeks                |
| 20               | BSA            | 50                                   | glucose             | 500                                    | 7.2       | 50            | 3 weeks                |
| 21               | BSA            | 50                                   | glucose             | 500                                    | 7.2       | 50            | 4 weeks                |
| 22               | BSA            | 50                                   | ribose              | 500                                    | 7.2       | 37            | 1 day                  |
| 23               | BSA            | 50                                   | ribose              | 500                                    | 7.2       | 37            | 2 days                 |
| 24               | BSA            | 50                                   | ribose              | 500                                    | 7.2       | 37            | 3 days                 |
| 25               | BSA            | 50                                   | ribose              | 500                                    | 7.2       | 37            | 1 week                 |
| 26               | BSA            | 50                                   | ribose              | 500                                    | 7.2       | 37            | 2 weeks                |
| 27               | BSA            | 50                                   | ribose              | 500                                    | 7.2       | 37            | 3 weeks                |
| 28               | BSA            | 50                                   | ribose              | 500                                    | 7.2       | 37            | 4 weeks                |
| 29               | BSA            | 50                                   | fructose            | 500                                    | 7.2       | 37            | 1 day                  |
| 30               | BSA            | 50                                   | fructose            | 500                                    | 7.2       | 37            | 2 days                 |
| 31               | BSA            | 50                                   | fructose            | 500                                    | 7.2       | 37            | 3 days                 |

|    |            |     |                |     |     |    |         |
|----|------------|-----|----------------|-----|-----|----|---------|
| 32 | BSA        | 50  | fructose       | 500 | 7.2 | 37 | 1 week  |
| 33 | BSA        | 50  | fructose       | 500 | 7.2 | 37 | 2 weeks |
| 34 | BSA        | 50  | fructose       | 500 | 7.2 | 37 | 3 weeks |
| 35 | BSA        | 50  | fructose       | 500 | 7.2 | 37 | 4 weeks |
| 36 | BSA        | 50  | Glyceraldehyde | 100 | 7.2 | 37 | 2 weeks |
| 37 | BSA        | 50  | Methylglyoxal  | 100 | 7.2 | 37 | 2 weeks |
| 38 | BSA        | 50  | glyoxal        | 100 | 7.2 | 37 | 2 weeks |
| 39 | BSA        | 50  | -              | -   | -   | -  | -       |
| 40 | HSA        | 50  | glucose        | 500 | 7.2 | 37 | 4 weeks |
| 41 | HSA        | 50  | ribose         | 500 | 7.2 | 37 | 4 weeks |
| 42 | HSA        | 50  | fructose       | 500 | 7.2 | 37 | 4 weeks |
| 43 | HSA        | 50  | Glyceraldehyde | 100 | 7.2 | 37 | 2 weeks |
| 44 | HSA        | 50  | Methylglyoxal  | 100 | 7.2 | 37 | 2 weeks |
| 45 | HSA        | 50  | glyoxal        | 100 | 7.2 | 37 | 2 weeks |
| 46 | HSA        | 50  | -              | -   | -   | -  | -       |
| 47 | IgG        | 10  | glucose        | 500 | 7.2 | 37 | 4 weeks |
| 48 | IgG        | 10  | ribose         | 500 | 7.2 | 37 | 4 weeks |
| 49 | IgG        | 10  | fructose       | 500 | 7.2 | 37 | 4 weeks |
| 50 | IgG        | 10  | Glyceraldehyde | 100 | 7.2 | 37 | 2 weeks |
| 51 | IgG        | 10  | Methylglyoxal  | 100 | 7.2 | 37 | 2 weeks |
| 52 | IgG        | 10  | glyoxal        | 100 | 7.2 | 37 | 2 weeks |
| 53 | IgG        | 10  | -              | -   | -   | -  | -       |
| 54 | Fibrinogen | 10  | glucose        | 500 | 7.2 | 37 | 4 weeks |
| 55 | Fibrinogen | 10  | ribose         | 500 | 7.2 | 37 | 4 weeks |
| 56 | Fibrinogen | 10  | fructose       | 500 | 7.2 | 37 | 4 weeks |
| 57 | Fibrinogen | 10  | Glyceraldehyde | 100 | 7.2 | 37 | 2 weeks |
| 58 | Fibrinogen | 10  | Methylglyoxal  | 100 | 7.2 | 37 | 2 weeks |
| 59 | Fibrinogen | 10  | glyoxal        | 100 | 7.2 | 37 | 2 weeks |
| 60 | Fibrinogen | 10  | -              | -   | -   | -  | -       |
| 61 | Collagen   | 0.1 | glucose        | 500 | 7.2 | 37 | 4 weeks |
| 62 | Collagen   | 0.1 | ribose         | 500 | 7.2 | 37 | 4 weeks |
| 63 | Collagen   | 0.1 | fructose       | 500 | 7.2 | 37 | 4 weeks |
| 64 | Collagen   | 0.1 | Glyceraldehyde | 100 | 7.2 | 37 | 2 weeks |

|    |          |      |                |     |     |    |         |
|----|----------|------|----------------|-----|-----|----|---------|
| 65 | Collagen | 0.1  | Methylglyoxal  | 100 | 7.2 | 37 | 2 weeks |
| 66 | Collagen | 0.1  | glyoxal        | 100 | 7.2 | 37 | 2 weeks |
| 67 | Collagen | 0.1  | -              | -   | -   | -  | -       |
| 68 | Collagen | 0.25 | glucose        | 500 | 7.2 | 37 | 4 weeks |
| 69 | Collagen | 0.25 | ribose         | 500 | 7.2 | 37 | 4 weeks |
| 70 | Collagen | 0.25 | fructose       | 500 | 7.2 | 37 | 4 weeks |
| 71 | Collagen | 0.25 | Glyceraldehyde | 100 | 7.2 | 37 | 2 weeks |
| 72 | Collagen | 0.25 | Methylglyoxal  | 100 | 7.2 | 37 | 2 weeks |
| 73 | Collagen | 0.25 | glyoxal        | 100 | 7.2 | 37 | 2 weeks |
| 74 | Collagen | 0.25 | -              | -   | -   | -  | -       |
