# Supplementary material for: A novel monoclonal antibody targeting carboxymethyllysine, an advanced glycation end product in atherosclerosis and pancreatic cancer
Source: PubMed Central journal article supplement (PMC5805250; doi:10.1371/journal.pone.0191872), 2018-02-08
Supplement: pone.0191872.s010.pdf [file pone.0191872.s010.pdf]

**S5 Table: Binding of D1-B2 to peptide library PepLib1**

| Peptide nr | Amino acid sequence                  | RFU   | Stdev |
|------------|--------------------------------------|-------|-------|
| 1          | M(CML)WVTFISLLLLFSSAYSRG             | 131   | 22    |
| 2          | LLFSSAYSRGVFRRDTH(CML)SE             | 44    | 16    |
| 3          | VFRRDTH(CML)SEIAHRF(CML)DLGE         | 3137  | 154   |
| 4          | IAHRF(CML)DLGEEHF(CML)GLVLIA         | 1505  | 97    |
| 5          | EHF(CML)GLVLIAFSQYLQQCPF             | 305   | 54    |
| 6          | FSQYLQQCPFDEHV(CML)LVNEL             | 296   | 32    |
| 7          | DEHV(CML)LVNELTEFA(CML)TCVAD         | 711   | 68    |
| 8          | TEFA(CML)TCVADESHAGCE(CML)SL         | 144   | 19    |
| 9          | ESHAGCE(CML)SLHTLFGDEL(CML)          | 210   | 49    |
| 10         | HTLFGDEL(CML)VASLRETYGD              | 529   | 67    |
| 11         | VASLRETYGDMADCCE(CML)QEP             | 1257  | 41    |
| 12         | MADCCE(CML)QEPERNECFLSH(CML)         | 545   | 4     |
| 13         | ERNECFLSH(CML)DDSPDLP(CML)L(CML)     | 59529 | 840   |
| 14         | DDSPDLP(CML)L(CML)PDPNTLCDEF         | 59843 | 579   |
| 15         | PDPNTLCDEF(CML)ADE(CML)(CML)FWG(CML) | 18739 | 777   |
| 16         | (CML)ADE(CML)(CML)FWG(CML)YLYEIARRHP | 23564 | 1121  |
| 17         | YLYEIARRHPYFYAPELLEY                 | 3704  | 726   |
| 18         | YFYAPELLEYAN(CML)YNGVFQE             | 321   | 53    |
| 19         | AN(CML)YNGVFQECCQAED(CML)GAC         | 1442  | 57    |
| 20         | CCQAED(CML)GACLLP(CML)IETMRE         | -8    | 3     |
| 21         | LLP(CML)IETMRE(CML)VLISSARQR         | 129   | 39    |
| 22         | (CML)VLISSARQRLRCASIQ(CML)FG         | 1596  | 229   |
| 23         | LRCASIQ(CML)FGERAL(CML)AWSVA         | 828   | 58    |
| 24         | ERAL(CML)AWSVARLSQ(CML)FP(CML)AE     | 148   | 26    |
| 25         | RLSQ(CML)FP(CML)AEFVEVT(CML)LVTD     | 328   | 33    |
| 26         | FVEVT(CML)LVTDLT(CML)VH(CML)ECCH     | 444   | 17    |
| 27         | LT(CML)VH(CML)ECCHGDLLECADDR         | 91    | 46    |
| 28         | GDLLECADDRADLA(CML)YICDN             | 24609 | 1642  |
| 29         | ADLA(CML)YICDNQDTISS(CML)L(CML)E     | 56151 | 1410  |
| 30         | QDTISS(CML)L(CML)ECCD(CML)PLLE(CML)S | 397   | 71    |
| 31         | CCD(CML)PLLE(CML)SHCIAEVE(CML)DA     | 364   | 23    |
| 32         | HCIAEVE(CML)DAIPENLPPLTA             | 1193  | 27    |
| 33         | IPENLPPLTADFAED(CML)DVC(CML)         | 8557  | 845   |
| 34         | DFAED(CML)DVC(CML)NYQEA(CML)DAFL     | 37325 | 2651  |
| 35         | NYQEA(CML)DAFLGSFLYEYSRR             | 40    | 25    |
| 36         | GSFLYEYSRRHPEYAVSVLL                 | 108   | 41    |
| 37         | HPEYAVSVLLRLA(CML)EYEATL             | 50    | 16    |
| 38         | RLA(CML)EYEATLECCA(CML)DDPH          | 139   | 6     |
| 39         | EECCA(CML)DDPHACYSTVFD(CML)L         | 215   | 24    |
| 40         | ACYSTVFD(CML)L(CML)HLVDEPQNL         | 1522  | 26    |
| 41         | (CML)HLVDEPQNLI(CML)QNCDQFE(CML)     | 172   | 28    |
| 42         | I(CML)QNCDQFE(CML)LGEYGFQNAL         | 4512  | 252   |
| 43         | LGEYGFQNALIVRYTR(CML)VPQ             | 152   | 46    |
| 44         | IVRYTR(CML)VPQVSTPTLVEVS             | 73    | 14    |
| 45         | VSTPTLVEVSRLSG(CML)VGTRC             | 199   | 31    |
| 46         | RSLG(CML)VGTRCCT(CML)PESERMP         | 679   | 79    |
| 47         | CT(CML)PESERMPCTEDYLSLIL             | 73    | 20    |
| 48         | CTEDYLSLILNRLCVLHE(CML)T             | 70    | 27    |

|    |                                                 |       |     |
|----|-------------------------------------------------|-------|-----|
| 49 | NRLCVLHE(CML)TPVSE(CML)VT(CML)CC                | 806   | 268 |
| 50 | PVSE(CML)VT(CML)CCTESLVNRRPC                    | 135   | 43  |
| 51 | TESLVNRRPCFSALTPDETY                            | 91    | 27  |
| 52 | FSALTPDETYVP(CML)AFDE(CML)LF                    | 179   | 13  |
| 53 | VP(CML)AFDE(CML)LFTFHADICTLP                    | 335   | 116 |
| 54 | TFHADICTLPDTE(CML)QI(CML)(CML)QT                | 51656 | 967 |
| 55 | DTE(CML)QI(CML)(CML)QTALVELL(CML)H(CML)P        | 6     | 20  |
| 56 | ALVELL(CML)H(CML)P(CML)ATEEQL(CML)TV            | 48    | 10  |
| 57 | (CML)ATEEQL(CML)TVMENFVAFVD(CML)                | 232   | 213 |
| 58 | MENFVAFVD(CML)CCAADD(CML)EAC                    | 36    | 15  |
| 59 | CCAADD(CML)EACFAVEGP(CML)LVV                    | 61    | 6   |
| 60 | FAVEGP(CML)LVVSTQTALA                           | 196   | 29  |
| 61 | unmodified BSA (negative control)               | 84    |     |
| 62 | CML-BSA, reductive amination (positive control) | 63225 |     |
| 63 | CML-IgG reductive amination, (positive control) | 23008 |     |
| 64 | Peptide 1-6 (positive controls)                 | -4    |     |
