# Supplementary material for: A novel monoclonal antibody targeting carboxymethyllysine, an advanced glycation end product in atherosclerosis and pancreatic cancer
Source: PubMed Central journal article supplement (PMC5805250; doi:10.1371/journal.pone.0191872), 2018-02-08
Supplement: pone.0191872.s011.pdf [file pone.0191872.s011.pdf]

**S6 Table: Binding of D1-B2 to peptide library PepLib2**

| Peptide nr | Amino acid sequence   | RFU   | Stdev |
|------------|-----------------------|-------|-------|
| 1          | MKWVTFISLLLLFSSAYSRG  | 15    | 2     |
| 2          | LLFSSAYSRGVFRRDTHKSE  | 483   | 306   |
| 3          | VFRRDTHKSEIAHRFKDLGE  | 11    | 16    |
| 4          | IAHRFKDLGEEHFKGLVLIA  | 40    | 25    |
| 5          | EHFKGLVLIAFSQYLQQCPF  | 71    | 13    |
| 6          | FSQYLQQCPFDEHVKLVNEL  | 83    | 23    |
| 7          | DEHVKLVNELTEFAKTCVAD  | 38    | 26    |
| 8          | TEFAKTCVADESHAGCEKSL  | 38    | 39    |
| 9          | ESHAGCEKSLHTLFGDELCK  | 82    | 11    |
| 10         | HTLFGDELCKVASLRETYGD  | 100   | 11    |
| 11         | VASLRETYGDMADCCEKQEP  | 13    | 8     |
| 12         | MADCCEKQEPERNECFLSHK  | 88    | 11    |
| 13         | ERNECFLSHKDDSPDLPLK   | 253   | 45    |
| 14         | 1DDSPDLPLKLPDPNTLCDEF | 1288  | 248   |
| 15         | PDPNTLCDEFKADEKKFWGK  | 122   | 38    |
| 16         | KADEKKFWGKLYEIARRHP   | 223   | 25    |
| 17         | LYEIAARRHPYFYAPELLYY  | 17    | 12    |
| 18         | YFYAPELLYYANKYNGVFQE  | 22    | 22    |
| 19         | ANKYNGVFQECCQAEDKGAC  | 86    | 32    |
| 20         | CCQAEDKGACLLPKIETMRE  | 48    | 8     |
| 21         | LLPKIETMREKVLASSARQR  | 22    | 46    |
| 22         | KVLASSARQLRCASIQKFG   | 12411 | 982   |
| 23         | LRCASIQKFGERALKAWSVA  | 1478  | 104   |
| 24         | ERALKAWSVARLSQKFPKAE  | 546   | 32    |
| 25         | RLSQKFPKAEFVEVTKLVTD  | 26    | 16    |
| 26         | FVEVTKLVTDLTKVHKECCH  | 30    | 32    |
| 27         | LTKVHKECCHGDLLECADDR  | 136   | 24    |
| 28         | GDLLECADDRADLAKYICDN  | 494   | 9     |
| 29         | ADLAKYICDNQDTISSKLKE  | 67    | 16    |
| 30         | QDTISSKLKECCDKPILLEKS | 80    | 27    |
| 31         | CCDKPILLEKSHCIAEVEKDA | 4     | 4     |
| 32         | HCIAEVEKDAIPENLPPLTA  | 47    | 21    |
| 33         | IPENLPPLTADFAEDKDVCK  | 4     | 16    |
| 34         | DFAEDKDVCKNYQEAKDAFL  | 17    | 24    |
| 35         | NYQEAKDAFLGSFLYEYSRR  | 7     | 8     |
| 36         | GSFLYEYSRRHPEYAVSVLL  | 121   | 81    |
| 37         | HPEYAVSVLLRLAKEYEATL  | -4    | 3     |
| 38         | RLAKEYEATLECCAADDPH   | 89    | 15    |
| 39         | EECCAADDPHACYSTVFDKL  | 65    | 14    |
| 40         | ACYSTVFDKLVDEPQNL     | 0     | 27    |
| 41         | KLVDEPQNLIKQNCQDFEK   | 63    | 5     |
| 42         | IKQNCQDFEKLGEYGFQNAL  | 47    | 4     |
| 43         | LGEYGFQNALIVRYTRKVPQ  | 414   | 25    |
| 44         | IVRYTRKVPQVSTPTLVEVS  | 116   | 41    |
| 45         | VSTPTLVEVSRSLGKVGTRC  | 986   | 204   |
| 46         | RSLGKVGTRCCTKPESERMP  | 766   | 214   |
| 47         | CTKPESERMPCTEDYLSLIL  | 36    | 26    |
| 48         | CTEDYLSLILNRLCVLHEKT  | 14    | 4     |

|    |                                                 |       |     |
|----|-------------------------------------------------|-------|-----|
| 49 | NRLCVLHEKTPVSEKVTKCC                            | 37    | 27  |
| 50 | PVSEKVTCCCTESLVNRRPC                            | 8074  | 615 |
| 51 | TESLVNRRPCFSALTPDETY                            | 41    | 9   |
| 52 | FSALTPDETYVPKAFDEKLF                            | -5    | 15  |
| 53 | VPKAFDEKLFFHADICTLP                             | 2     | 11  |
| 54 | TFHADICTLPDTEKQIKKQT                            | 44    | 17  |
| 55 | DTEKQIKKQTALVELLHKHP                            | 27    | 7   |
| 56 | ALVELLHKHPKATEEQLKTV                            | 77    | 44  |
| 57 | KATEEQLKTVMENFVAFVDK                            | 19    | 19  |
| 58 | MENFVAFVDKCCAADDKEAC                            | 218   | 90  |
| 59 | CCAADDKEACFAVEGPKLVV                            | 104   | 36  |
| 60 | FAVEGPKLVVSTQTALA                               | 15    | 3   |
| 61 | unmodified BSA (negative control)               | 28    |     |
| 62 | CML-BSA, reductive amination (positive control) | 45350 |     |
| 63 | CML-IgG reductive amination, (positive control) | 18897 |     |
| 64 | Peptide 1-6 (positive controls)                 | 330   |     |
