# Supplementary material for: A novel monoclonal antibody targeting carboxymethyllysine, an advanced glycation end product in atherosclerosis and pancreatic cancer
Source: PubMed Central journal article supplement (PMC5805250; doi:10.1371/journal.pone.0191872), 2018-02-08
Supplement: pone.0191872.s012.pdf [file pone.0191872.s012.pdf]

**S7 Table: Binding of D1-B2 to peptide library PepLib3**

| Peptide nr | Amino acid sequence                          | RFU   | Stdev |
|------------|----------------------------------------------|-------|-------|
| 1          | DDSPDLP(CML)L(CML)PDPNTLCDEF                 | 30042 | 11855 |
| 2          | <u>A</u> DDSPDLP(CML)L(CML)PDPNTLCDEF        | 56414 | 1112  |
| 3          | D <u>A</u> SPDLP(CML)L(CML)PDPNTLCDEF        | 47876 | 4857  |
| 4          | DD <u>A</u> PDLP(CML)L(CML)PDPNTLCDEF        | 49550 | 1076  |
| 5          | DDSP <u>A</u> DLP(CML)L(CML)PDPNTLCDEF       | 57762 | 1056  |
| 6          | DDSP <u>A</u> LP(CML)L(CML)PDPNTLCDEF        | 6926  | 1116  |
| 7          | DDSPD <u>A</u> P(CML)L(CML)PDPNTLCDEF        | 54840 | 608   |
| 8          | DDSPD <u>L</u> A(CML)L(CML)PDPNTLCDEF        | 51637 | 1600  |
| 9          | DDSPDLP <u>A</u> L(CML)PDPNTLCDEF            | 2612  | 297   |
| 10         | DDSPDLP(CML) <u>A</u> (CML)PDPNTLCDEF        | 61738 | 419   |
| 11         | DDSPDLP(CML)L <u>A</u> PDPNTLCDEF            | 60168 | 581   |
| 12         | DDSPDLP(CML)L(CML) <u>A</u> DPNTLCDEF        | 51099 | 2372  |
| 13         | DDSPDLP(CML)L(CML) <u>P</u> APNTLCDEF        | 59487 | 377   |
| 14         | LP(CML)L(CML)PDP                             | 121   | 115   |
| 15         | <u>P</u> DLP(CML)L(CML)P <u>D</u> PN         | 20529 | 353   |
| 16         | <u>D</u> PLP(CML)L(CML)P <u>D</u> PN         | 688   | 90    |
| 17         | PL <u>D</u> P(CML)L(CML)P <u>D</u> PN        | 737   | 92    |
| 18         | PLP <u>D</u> (CML)L(CML)P <u>D</u> PN        | 501   | 32    |
| 19         | <u>P</u> DLP(CML)L(CML) <u>D</u> PPN         | 21593 | 1188  |
| 20         | <u>P</u> DLP(CML)L(CML)P <u>P</u> DN         | 46557 | 798   |
| 21         | <u>P</u> DLP(CML)L(CML)P <u>P</u> ND         | 6007  | 105   |
| 22         | PLP <u>D</u> (CML)L(CML) <u>D</u> PPN        | 207   | 35    |
| 23         | PL <u>D</u> P(CML)L(CML)P <u>D</u> PN        | 28    | 1     |
| 24         | <u>P</u> DLP(CML)L(CML)P <u>P</u> DN         | 48201 | 455   |
| 25         | <u>D</u> PLP(CML)L(CML)P <u>P</u> ND         | 3270  | 598   |
| 26         | <u>P</u> <u>E</u> LP(CML)L(CML)P <u>D</u> PN | 1338  | 156   |
| 27         | <u>P</u> DLP(CML)L(CML)P <u>E</u> PN         | 13599 | 630   |
| 28         | <u>P</u> <u>E</u> LP(CML)L(CML)P <u>E</u> PN | 391   | 44    |
| 29         | PDLP(CML) <u>A</u> (CML)PDPN                 | 20114 | 1128  |
| 30         | PDLP(CML) <u>C</u> (CML)PDPN                 | 51597 | 2291  |
| 31         | PDLP(CML) <u>D</u> (CML)PDPN                 | 20802 | 349   |
| 32         | PDLP(CML) <u>E</u> (CML)PDPN                 | 53449 | 373   |
| 33         | PDLP(CML) <u>F</u> (CML)PDPN                 | 53018 | 924   |
| 34         | PDLP(CML) <u>G</u> (CML)PDPN                 | 30667 | 1588  |
| 35         | PDLP(CML) <u>H</u> (CML)PDPN                 | 31201 | 32    |
| 36         | PDLP(CML) <u>I</u> (CML)PDPN                 | 53748 | 313   |
| 37         | PDLP(CML) <u>K</u> (CML)PDPN                 | 47701 | 1722  |
| 38         | PDLP(CML) <u>L</u> (CML)PDPN                 | 37306 | 1871  |
| 39         | PDLP(CML) <u>M</u> (CML)PDPN                 | 13406 | 741   |
| 40         | PDLP(CML) <u>N</u> (CML)PDPN                 | 14097 | 430   |
| 41         | PDLP(CML) <u>P</u> (CML)PDPN                 | 23624 | 203   |
| 42         | PDLP(CML) <u>Q</u> (CML)PDPN                 | 20492 | 1400  |
| 43         | PDLP(CML) <u>R</u> (CML)PDPN                 | 4     | 22    |
| 44         | PDLP(CML) <u>S</u> (CML)PDPN                 | 35401 | 2300  |
| 45         | PDLP(CML) <u>T</u> (CML)PDPN                 | 43528 | 1413  |
| 46         | PDLP(CML) <u>V</u> (CML)PDPN                 | 51308 | 3198  |
| 47         | PDLP(CML) <u>W</u> (CML)PDPN                 | 55166 | 793   |
| 48         | PDLP(CML) <u>Y</u> (CML)PDPN                 | 57157 | 530   |

|    |                                                 |       |      |
|----|-------------------------------------------------|-------|------|
| 49 | DDSPDLP(CML)L(CML)PD <u>A</u> N TLCDEF          | 44210 | 754  |
| 50 | DDSPDLP(CML)L(CML)PDP <u>A</u> TLCDEF           | 44558 | 197  |
| 51 | DDSPDLP(CML)L(CML)PDPN <u>A</u> LCDEF           | 32132 | 1087 |
| 52 | DDSPDLP(CML)L(CML)PDPNT <u>A</u> CDEF           | 21562 | 1538 |
| 53 | DDSPDLP(CML)L(CML)PDPNTL <u>A</u> DEF           | 44990 | 1375 |
| 54 | DDSPDLP(CML)L(CML)PDPNTL <u>C</u> ADEF          | 11624 | 882  |
| 55 | DDSPDLP(CML)L(CML)PDPNTL <u>C</u> D <u>A</u> F  | 50981 | 1175 |
| 56 | DSPDLP(CML)L(CML)PDPNTLCDE                      | 50500 | 3261 |
| 57 | SPDLP(CML)L(CML)PDPNTLCD                        | 59204 | 579  |
| 58 | PDLP(CML)L(CML)PDPNTLC                          | 55390 | 563  |
| 59 | DLP(CML)L(CML)PDPNTL                            | 50525 | 1309 |
| 60 | P(CML)L(CML)PDPN                                | 3256  | 687  |
| 61 | P(CML)L(CML)PDP                                 | 4718  | 774  |
| 62 | P(CML)L(CML)PD                                  | 719   | 133  |
| 63 | P(CML)L(CML)P                                   | 1389  | 147  |
| 64 | (CML)L(CML)                                     | 2559  | 455  |
| 65 | DDSPDLP( <u>SL</u> )L( <u>SL</u> )PDPNTLCDEF    | -4    | 15   |
| 66 | CML-BSA reductive amination (positive control)  | 35221 | 184  |
| 67 | BSA (negative control)                          | 40    | 48   |
| 68 | CML-IgG, reductive amination (positive control) | 17779 | 614  |
| 69 | IgG (negative control)                          | 20058 | 261  |
