# Supplementary material for: A novel monoclonal antibody targeting carboxymethyllysine, an advanced glycation end product in atherosclerosis and pancreatic cancer
Source: PubMed Central journal article supplement (PMC5805250; doi:10.1371/journal.pone.0191872), 2018-02-08
Supplement: pone.0191872.s013.pdf [file pone.0191872.s013.pdf]

**S8 Table: Binding of D1-B2 to glycosylated protein library ProtLib1**

| Target nr/description                      | RFU   | Stdev |
|--------------------------------------------|-------|-------|
| 1. BSA, glucose, pH 7.2, 37°C, 1 d         | 938   | 140   |
| 2. BSA, glucose, pH 7.2, 37°C, 2 d         | 2411  | 877   |
| 3. BSA, glucose, pH 7.2, 37°C, 3 d         | 1125  | 336   |
| 4. BSA, glucose, pH 7.2, 37°C, 1 w         | 2924  | 513   |
| 5. BSA, glucose, pH 7.2, 37°C, 2 w         | 1215  | 178   |
| 6. BSA, glucose, pH 7.2, 37°C, 3 w         | 871   | 501   |
| 7. BSA, glucose, pH 7.2, 37°C, 4 w         | 193   | 213   |
| 8. BSA, glucose, pH 10, 37°C, 1 d          | 110   | 134   |
| 9. BSA, glucose, pH 10, 37°C, 2 d          | 27    | 11    |
| 10. BSA, glucose, pH 10, 37°C, 3 d         | 191   | 84    |
| 11. BSA, glucose, pH 10, 37°C, 1 w         | 1196  | 135   |
| 12. BSA, glucose, pH 10, 37°C, 2 w         | 2795  | 24    |
| 13. BSA, glucose, pH 10, 37°C, 3 w         | 3270  | 34    |
| 14. BSA, glucose, pH 10, 37°C, 4 w         | 7174  | 615   |
| 15. BSA, glucose, pH 7.2, 50°C, 1 d        | -20   | 17    |
| 16. BSA, glucose, pH 7.2, 50°C, 2 d        | 1264  | 573   |
| 17. BSA, glucose, pH 7.2, 50°C, 3 d        | 500   | 63    |
| 18. BSA, glucose, pH 7.2, 50°C, 1 w        | 144   | 81    |
| 19. BSA, glucose, pH 7.2, 50°C, 2 w        | 18    | 20    |
| 20. BSA, glucose, pH 7.2, 50°C, 3 w        | 70    | 49    |
| 21. BSA, glucose, pH 7.2, 50°C, 4 w        | 308   | 64    |
| 22. BSA, ribose, pH 7.2, 37°C, 1 d         | -12   | 20    |
| 23. BSA, ribose, pH 7.2, 37°C, 2 d         | 71    | 16    |
| 24. BSA, ribose, pH 7.2, 37°C, 3 d         | 666   | 29    |
| 25. BSA, ribose, pH 7.2, 37°C, 1 w         | 2658  | 70    |
| 26. BSA, ribose, pH 7.2, 37°C, 2 w         | 7852  | 140   |
| 27. BSA, ribose, pH 7.2, 37°C, 3 w         | 13364 | 585   |
| 28. BSA, ribose, pH 7.2, 37°C, 4 w         | 16595 | 721   |
| 29. BSA, fructose, pH 7.2, 37°C, 1 d       | 735   | 211   |
| 30. BSA, fructose, pH 7.2, 37°C, 2 d       | 73    | 59    |
| 31. BSA, fructose, pH 7.2, 37°C, 3 d       | 16    | 38    |
| 32. BSA, fructose, pH 7.2, 37°C, 1 w       | 456   | 358   |
| 33. BSA, fructose, pH 7.2, 37°C, 2 w       | 1262  | 672   |
| 34. BSA, fructose, pH 7.2, 37°C, 3 w       | 735   | 492   |
| 35. BSA, fructose, pH 7.2, 37°C, 4 w       | 587   | 333   |
| 36. BSA, glyceraldehyde, pH 7.2, 37°C, 2 w | 1259  | 32    |
| 37. BSA, methylglyoxal, pH 7.2, 37°C, 2 w  | 4436  | 668   |
| 38. BSA, glyoxal, pH 7.2, 37°C, 2 w        | 62501 | 264   |
| 39. BSA, unmodified                        | 1815  | 1235  |
| 40. HSA, glucose, pH 7.2, 37°C, 4 w        | 367   | 565   |
| 41. HSA, ribose, pH 7.2, 37°C, 4 w         | 2543  | 177   |
| 42. HSA, fructose, pH 7.2, 37°C, 4 w       | 79    | 96    |
| 43. HSA, glyceraldehyde, pH 7.2, 37°C, 2 w | 97    | 6     |
| 44. HSA, methylglyoxal, pH 7.2, 37°C, 2 w  | 65    | 9     |
| 45. HSA, glyoxal, pH 7.2, 37°C, 2 w        | 5909  | 855   |
| 46. HSA, unmodified                        | -120  | 33    |
| 47. IgG, glucose, pH 7.2, 37°C, 4 w        | 389   | 67    |
| 48. IgG, ribose, pH 7.2, 37°C, 4 w         | 1318  | 67    |

|                                                            |      |     |
|------------------------------------------------------------|------|-----|
| 49. IgG, fructose, pH 7.2, 37°C, 4 w                       | 227  | 75  |
| 50. IgG, glyceraldehyde, pH 7.2, 37°C, 2 w                 | 6008 | 441 |
| 51. IgG, methylglyoxal, pH 7.2, 37°C, 2 w                  | 4366 | 227 |
| 52. IgG, glyoxal, pH 7.2, 37°C, 2 w                        | 1808 | 348 |
| 53. IgG, unmodified                                        | 215  | 43  |
| 54. Fibrinogen, glucose, pH 7.2, 37°C, 4 w                 | 380  | 93  |
| 55. Fibrinogen, ribose, pH 7.2, 37°C, 4 w                  | 647  | 72  |
| 56. Fibrinogen, fructose, pH 7.2, 37°C, 4 w                | 3454 | 358 |
| 57. Fibrinogen, glyceraldehyde, pH 7.2, 37°C, 2 w          | 1028 | 69  |
| 58. Fibrinogen, methylglyoxal, pH 7.2, 37°C, 2 w           | 7280 | 285 |
| 59. Fibrinogen, glyoxal, pH 7.2, 37°C, 2 w                 | 9839 | 233 |
| 60. Fibrinogen, unmodified                                 | 1243 | 522 |
| 61. 0.1 mg/ml collagen, glucose, pH 7.2, 37°C, 4 w         | 50   | 33  |
| 62. 0.1 mg/ml collagen, ribose, pH 7.2, 37°C, 4 w          | 56   | 2   |
| 63. 0.1 mg/ml collagen, fructose, pH 7.2, 37°C, 4 w        | 52   | 15  |
| 64. 0.1 mg/ml collagen, glyceraldehyde, pH 7.2, 37°C, 2 w  | 118  | 10  |
| 65. 0.1 mg/ml collagen, methylglyoxal, pH 7.2, 37°C, 2 w   | 278  | 56  |
| 66. 0.1 mg/ml collagen, glyoxal, pH 7.2, 37°C, 2 w         | 267  | 83  |
| 67. 0.1 mg/ml collagen, unmodified                         | -31  | 39  |
| 68. 0.25 mg/ml collagen, glucose, pH 7.2, 37°C, 4 w        | 88   | 52  |
| 69. 0.25 mg/ml collagen, ribose, pH 7.2, 37°C, 4 w         | 110  | 22  |
| 70. 0.25 mg/ml collagen, fructose, pH 7.2, 37°C, 4 w       | 173  | 109 |
| 71. 0.25 mg/ml collagen, glyceraldehyde, pH 7.2, 37°C, 2 w | 628  | 44  |
| 72. 0.25 mg/ml collagen, methylglyoxal, pH 7.2, 37°C, 2 w  | 246  | 33  |
| 73. 0.25 mg/ml collagen, glyoxal, pH 7.2, 37°C, 2 w        | 206  | 32  |
| 74. 0.25 mg/ml collagen, unmodified                        | 624  | 349 |
